1 **A COMMERCIAL AUTOGENOUS INJECTION VACCINE PROTECTS BALLAN**  
2 **WRASSE (*LABRUS BERGYLTA*, *ASCANIUS*) AGAINST *AEROMONAS***  
3 ***SALMONICIDA VAPA* TYPE V**

4

5 J. Gustavo Ramirez-Paredes<sup>1,2</sup>, D. Verner-Jeffreys<sup>3</sup>, A. Papadopoulou<sup>1†</sup>, S. J Monaghan<sup>1</sup>, L.  
6 Smith<sup>3</sup>, D. Haydon<sup>2</sup>, T. S. Wallis<sup>2</sup>, A. Davie<sup>1</sup>, A. Adams<sup>1</sup> and H. Migaud<sup>1\*</sup>

7

8 <sup>1</sup>*Institute of Aquaculture, Faculty of Natural Sciences, University of Stirling, Stirling, Scotland,*  
9 *FK9 4LA, UK*

10 <sup>2</sup>*Ridgeway Biologicals Ltd. a Ceva Santé Animale company, Units 1-3 Old Station Business*  
11 *Park, Compton, Berkshire, England, RG20 6NE, UK*

12 <sup>3</sup>*Centre for Environment, Fisheries and Aquaculture Science, Barrack Road - The Nothe,*  
13 *Weymouth, Dorset, England, DT4 8UB, UK*

14

15 † Current address: <sup>4</sup>*The Roslin Institute and Royal (Dick) School of Veterinary Studies,*  
16 *University of Edinburgh, Midlothian, Scotland, EH25 9RG, UK*

17

18 \*Correspondence: Professor Herve Migaud, Institute of Aquaculture, Faculty of Natural  
19 Sciences, University of Stirling, Stirling, Scotland, FK9 4LA, UK

20 [herve.migaud@stir.ac.uk](mailto:herve.migaud@stir.ac.uk)

21

22 **ABSTRACT**

23 Atypical *Aeromonas salmonicida* (aAs) and *Vibrionaceae* related species are bacteria routinely  
24 recovered from diseased ballan wrasse used as cleaner fish in Atlantic salmon farming.  
25 Autogenous multivalent vaccines formulated from these microorganisms are widely used by  
26 the industry to protect farmed wrasse despite limited experimental proof that they are primary  
27 pathogens. In this study, the components of a commercial multivalent injection wrasse vaccine  
28 were tested for infectivity, pathogenicity and virulence via intra peritoneal injection at pre-  
29 deployment size (25-50g) and the efficacy of the vaccine for protection against aAs assessed.  
30 Injection with  $3.5 \times 10^9$ ,  $8 \times 10^9$ ,  $1.8 \times 10^9$  and  $5 \times 10^9$  cfu/fish of *Vibrio splendidus*, *V. ichthyoenteri*,  
31 *Aliivibrio logeii* and *A. salmonicida*, respectively, did not cause significant mortalities, lesions  
32 or clinical signs after a period of 14 days. IP injection with both aAs and *Photobacterium*

33 *indicum* successfully reproduced the clinical signs and internal lesions observed during natural  
34 outbreaks of the disease. Differences in virulence ( $LD_{50}$  at day 8-post infection of  $3.6 \times 10^6$   
35 cfu/fish and  $1.6 \times 10^7$  cfu/fish) were observed for two *aAs vapA* type V isolates. In addition, the  
36  $LD_{50}$  for *Photobacterium indicum* was  $2.2 \times 10^7$  cfu/fish. The autogenous vaccine was highly  
37 protective against the two *aAs vapA* type V isolates after 700-degree days of immunisation.  
38 The  $RPS_{FINAL}$  values for the first isolate were 95 and 91% at  $1 \times 10^6$  cfu/fish and  $1 \times 10^7$  cfu/fish,  
39 respectively, and 79% at  $1 \times 10^7$  cfu/fish for the second isolate tested. In addition, significantly  
40 higher anti *aAs* seral antibodies (IgM), were detected by ELISA in vaccinated fish in contrast  
41 with control (mock vaccinated) fish. These results suggest wrasse can be effectively immunised  
42 and protected against *aAs* infection by injection with oil adjuvanted vaccines prepared with  
43 inactivated homologous isolates. Further work should assess the efficacy of vaccination against  
44 other isolates that have proven to be pathogenic such as *aAs* type VI and *Photobacterium*  
45 *indicum* and explore the feasibility of immersion vaccination. In addition, a full  
46 characterisation of *aAs* isolates within the same *vapA* types should be performed as differences  
47 in virulence between *vapA* type V isolates were observed and partial genome analysis indicated  
48 small but potentially important genomic differences in these isolates.

49

50 **Key Words:** wrasse vaccines, bacterial diseases, atypical *Aeromonas salmonicida*, cleaner  
51 fish diseases, vibriosis in wrasse, *Photobacterium indicum*.

## 52 INTRODUCTION

53 Bacterial pathogens are considered the major cause of infectious diseases and mortalities in  
54 farmed ballan wrasse produced for sea lice control in the salmon farming industry [1-3]. In  
55 Scotland, atypical *Aeromonas salmonicida* (*aAs*) *vapA* type V and VI, *Vibrio splendidus*, *V.*  
56 *ichthyoenteri*, *Aliivibrio salmonicida*, *A. logeii*, and *Photobacterium indicum* are the bacterial  
57 pathogens most frequently isolated from ballan wrasse during outbreaks of disease in both  
58 hatcheries and post deployment in salmon sea sites [4]. Similar reports are available for the  
59 species in Norway [3].

60 Immunisation of farmed salmonids (Atlantic salmon and rainbow trout) against typical *As*  
61 using fully licenced oil-adjuvanted injectable vaccines has historically proven successful and  
62 is a standard practice [5]. However, immunisation of non-salmonid species against typical and  
63 atypical *As* has been rather challenging [6-8]. For instance, an experimental vaccine containing  
64 atypical strains protected Arctic charr (*Salvelinus alpinus*, L.) but not in European grayling  
65 (*Thymallus thymallus*, L.) [9]. Furthermore, commercial furunculosis vaccines for salmonids  
66 have induced protection in Atlantic halibut (*Hippoglossus hippoglossus*, L.) but not in Atlantic  
67 cod (*Gadus morhua*, L.) or turbot (*Scophthalmus maximus*, L.) [6-8].

68 Currently no licenced or registered vaccines are commercially available in the UK for the  
69 prevention and control of infectious diseases in ballan wrasse. Therefore, prophylactic  
70 treatments in Scotland are mainly based on the use of autogenous vaccines, which are  
71 formulated with antigens derived from pathogens recovered during episodes of elevated  
72 mortality [2].

73 Autogenous or “herd specific” vaccines are farm specific immunological veterinary medicinal  
74 products that have the potential to be rapidly developed and deployed when no off-the shelf  
75 fully licensed vaccines exist or these have proven infective. In principle, autogenous vaccines  
76 must be inactivated (killed), manufactured in licenced facilities, used only under veterinary  
77 prescription and on the sites where the pathogens were isolated [10-13].

78 In Scotland, autogenous vaccines for ballan wrasse were first developed from isolates collected  
79 during disease outbreaks between 2013 and 2014 (Ridgeway Biologicals Ltd.) and used in  
80 hatcheries and wild caught wrasse. The vaccine formulation later evolved and new isolates  
81 were introduced following a health screening surveys [4]. However without established  
82 challenged models for the Scottish bacteria and wrasse populations, the actual virulence of the  
83 isolates and the efficacy/potency of the vaccine components remained unknown.

84 Overall, i.p. injection challenges with atypical strains of *As* have been successful in several  
85 species with a wide range of doses used [14]. For instance, juvenile spotted wolffish  
86 (*Anarhichas minor*, L) succumbed to disease when i.p. injected with a*As* at  $10^3$  and  $10^4$  cfu /  
87 mL [8, 15], while high morbidities in turbot were reported [16], but only in fish exposed with  
88 the same method to  $10^8$  and  $10^{10}$  cfu / mL. Experimentally infected ballan wrasse and  
89 lumpsucker also experienced high morbidities (> 70%) when challenged with Norwegian a*As*  
90 isolates at doses of  $2 \times 10^3$  cfu / mL (bath) and  $2 \times 10^6$  cfu /mL (i.p. injection), and  $10^8$  cfu /mL  
91 (i.p. injection), respectively [17, 18]. As for the *Vibrionaceae* pathogens in cleaner fish, in a  
92 previous study in Norway, only *Vibrio anguillarum* originally isolated from Atlantic salmon  
93 caused high mortalities (up to 60%) in ballan wrasse under experimental conditions, while  
94 Norwegian ballan wrasse isolates of the same bacterial species caused < 20% mortalities when  
95 challenged via bath, cohabitation and i.p. injection [17].

96 Given that, a*As* and *Vibrionaceae* isolates are highly heterogenic and variable, and virulence is  
97 often strain and host dependant [1, 19], the establishment of similar experiments in other  
98 geographical areas such as Scotland is of high relevance for the local industry.

99 In the present study, *in vivo* challenge models were developed via intraperitoneal (i.p.) injection  
100 in Scottish ballan wrasse (25-50 g) to investigate the infectivity, pathogenicity and virulence  
101 of isolates routinely recovered from diseased wrasse and used as antigens in commercial  
102 autogenous vaccines. These isolates included a*As vapA* types V and VI, *Vibrio splendidus*, *V.*  
103 *ichthyoenteri*, *Aliivibrio salmonicida*, *A. logeii*, and *Photobacterium indicum*. Furthermore, the  
104 efficacy of the a*As vapA* type V components of the vaccine was assessed by measuring survival  
105 rates after experimentally infecting vaccinated and control fish by i.p. injection with  
106 homologous isolates at medium, high and very high doses and its potency expressed in terms  
107 of RPS. Specific antibody (IgM) kinetics were assessed as a relevant correlate of protection.

## 108 MATERIALS AND METHODS

### 109 Bacterial identification and genotyping

110 The bacterial isolates used were recovered from diseased fish at commercial hatcheries and  
111 characterised on the basis of phenotypic and genotypic characteristics as part of a previous  
112 study [4]. In brief, bacterial DNA was extracted using Genesig® Easy DNA/RNA Extraction  
113 Kit (Primerdesign Ltd, Southampton UK) according to the manufacturer's instructions. Species  
114 confirmation was performed on the samples by targeting the V3-V4 hypervariable region of  
115 the *16S rRNA* gene [20] and the subunit B protein of DNA gyrase (topoisomerase type II) –

116 *gyrB* gene [21]. The *Aeromonas salmonicida* isolates were then genotyped by sequencing the  
117 A-layer membrane as described previously [22].

118 For the experimental infections, the *aAs* isolates were grown on tryptone soya agar (TSA,  
119 Oxoid, UK) or blood agar (BA; TSA + 5% sheep blood Thermo Fisher) while the *Vibrionaceae*  
120 isolates were on sea water agar (SWA, Oxoid, UK) and incubated at 22 °C for 48 and 24 h,  
121 respectively. For growth in liquid media, *aAs* isolates were inoculated onto trypticase soy broth  
122 (TSB, Oxoid, UK) and *Vibrionaceae* isolates onto TSB + 2% NaCl (Oxoid, UK,) and incubated  
123 at 22 °C for 18-24 h, with continuous shaking at 180 rpm. For harvesting, all bacteria were  
124 centrifuged at 4 °C for 10 min at 2,000 x g, bacterial pellets were then washed with sterile 1x  
125 phosphate-buffered saline (PBS) and resuspended in sterile PBS to the required concentration  
126 (cfu/mL) for the experiments.

127 With the exception of isolate TW164/15 (*aAs vapA* type VI) that was recovered from moribund  
128 lumpsucker (*Cyclopterus lumpus*) the rest of the isolates were recovered from ballan wrasse.  
129 A summary of the isolates used in this study is presented in Table 1.

**Table 1.** Bacterial isolates used in this study for pathogenicity, virulence and vaccine assessment.

| Isolate ID            | Bacterial species             | Year of isolation | <i>vapA</i> type and /or isolate # |
|-----------------------|-------------------------------|-------------------|------------------------------------|
| TW4/14** <sup>v</sup> | <i>Aeromonas salmonicida</i>  | 2014              | V                                  |
| TW187/14 <sup>v</sup> | <i>Aeromonas salmonicida</i>  | 2014              | V                                  |
| TW3/14** <sup>v</sup> | <i>Aeromonas salmonicida</i>  | 2014              | V                                  |
| TW164/15 <sup>v</sup> | <i>Aeromonas salmonicida</i>  | 2015              | VI                                 |
| TW184/16*             | <i>Aeromonas salmonicida</i>  | 2016              | VI                                 |
| TW242/16              | <i>Aliivibrio logei</i>       | 2016              | Isolate 1                          |
| TW186/16              | <i>Aliivibrio logei</i>       | 2016              | Isolate 2                          |
| TW322/16              | <i>Aliivibrio salmonicida</i> | 2016              | Isolate 1                          |
| TW130/16 <sup>v</sup> | <i>Vibrio splendidus</i>      | 2016              | Isolate 1                          |
| TW319/16              | <i>Vibrio ichthyenteri</i>    | 2016              | Isolate 1                          |
| TW138/16              | <i>Photobacterium indicum</i> | 2016              | Isolate 1                          |
| TW181/16              | <i>Photobacterium indicum</i> | 2016              | Isolate 2                          |

(\*) isolated from lumpsucker, (\*\*) isolates used for vaccination efficacy trial, (v) isolates present in the commercial vaccine tested.

### 130 **Experimental fish**

131 A population of naïve *i.e.* unvaccinated and non-diseased ballan wrasse (30 ± 5 g) was provided  
132 by a commercial cleaner fish hatchery on the west coast of Scotland. Prior to the study, the

133 health status of the fish was checked by screening a subset of the population with standard  
134 histological, bacteriological and molecular methods to confirm the absence of *aAs* [4, 22],  
135 amoebic gill disease [23] and *Vibrionaceae* related bacteria [20, 21]. After confirmation they  
136 were free of these pathogens, fish were transferred to the Centre for Environment, Fisheries  
137 and Aquaculture Science (Cefas) Weymouth Laboratory in February 2017.

138 Fish were acclimated and quarantined for 3 weeks after arrival in 6 aerated aquaria (approx.  
139 900 L, tanks enriched with artificial plastic kelp and sections of plastic pipes to provide hides  
140 to the fish) at  $12.0 \pm 0.5$  °C with a 20:4 h light:dark photoperiod, water flow of 4.0 L / min and  
141 dissolved oxygen (DO) at  $8 \pm 0.5$  mg / L. During this period, fish were further screened for  
142 bacteriology (swabs from head kidney plated onto SWA), histopathology (fixed in 10% neutral  
143 buffered formalin) and molecular methods as described before. In addition, virology diagnostic  
144 tests were performed to discard the presence of notifiable viral diseases as per the protocols in  
145 the OIE manual of diagnostic tests for aquatic animals [24].

#### 146 **Vaccine**

147 A commercial injectable (oil-based) multivalent autogenous vaccine, containing antigens from  
148 isolates TW3/14, TW4/14, TW187/14, TW164/15 and TW130/16 (Table 1) was provided by  
149 Ridgeway Biologicals Ltd. The vaccine was shipped to Cefas and stored at  $4 \pm 1$  °C prior to  
150 use.

#### 151 **Confirmation of infectivity of components of multivalent autogenous vaccine**

152 The virulence of bacterial isolates, representative of strains commonly used as components of  
153 the multivalent autogenous vaccines used in the industry, was assessed in a series of infection  
154 experiments performed in 30 L tanks enriched as for acclimation tanks (Table 2).

155 For the first infection experiment, limited numbers of  $30 \pm 5$  g fish (n= 6) were injected with  
156 an  $OD_{600} \sim 1.57$  bacterial suspension of different isolates representing 4 different bacterial  
157 species (*aAs* including two type V and one type VI isolates, *Vibrio splendidus*, *Aliivibrio*  
158 *salmonicida* and *Vibrio ichthyoenteri*) (Table 2).

159 In the second infection experiment, the pathogens that did not cause morbidities or signs of  
160 disease during the first infection experiment were i.p. injected in naïve ballan wrasse at a higher  
161 dose. To confirm that these isolates were not pathogenic via this exposure route, the number of  
162 fish tested was also increased to 15 per isolate, and the length of the experiment was prolonged  
163 to 16 days. In addition, an *aAs vapA* type VI (isolate TW164/15) recovered from lumpsucker  
164 was also included (Table 2).

165 In the third infection experiment, fish (n= 12) were i.p. injected with medium ( $10^7$  cfu/fish) and  
166 high ( $10^9$  cfu/fish) doses of 2x isolates of *Aliivibrio logei* and *Photobacterium indicum* as well  
167 2x isolates of *aAs vapA* type VI and observed for at least 25 days (Table 2). The isolates used  
168 were prepared directly from cryopreserved stocks and had not previously passaged in fish.

169 Moribund fish and mortalities from all experiments were removed from the tanks, their external  
170 and internal condition assessed. Head kidney swabs were taken onto solid media for  
171 bacteriological assessment. Isolates not recovered, despite being i.p injected into the fish at  
172 high doses, were regarded as non-infectious. The bacteria recovered were subcultured to purity,  
173 their identities confirmed and cryopreserved at  $-80$  °C until further use.

174 Additional infection experiments 4 and 5 were also undertaken. These were to better determine  
175 both the relevant virulence of the different *aAs* isolates *vapA* type V and identify doses that  
176 would ideally result in high, but not excessive (50-75% mortality), suitable for use in vaccine  
177 efficacy testing. In infection experiment 4, 4x different doses of each pathogen were tested (n=  
178 15 fish per dose) with a control treatment (PBS) included. Initial results generated by infection  
179 experiment 4 were confirmed in a second set of pre-tests with a longer observation period post  
180 injection (4 weeks) without PBS controls (Table 2). The isolates used were passaged (recovered  
181 from moribund fish) from infection experiments 1 and 2 (Table 2).

182 For the isolates where the use of lower and higher doses caused a mortality response below and  
183 above 50% respectively, the median lethal dose ( $LD_{50}$ ) was calculated according to [27] to  
184 define and compare their virulence at the time point of occurrence. Results obtained from both  
185 experiments 4 and 5 were used to select isolates for vaccine testing and determine the doses for  
186 the main challenge infection in the vaccine efficacy trial (Table 2). In addition, differences  
187 within the *aAs vapA* type V isolates TW4/14, TW187/14 and TW3/14 were investigated with  
188 macrorestriction analysis using pulsed field gel electrophoresis (PFGE) as described previously  
189 [25] with the following modifications. Bacteria were grown on TSA at  $15$  °C for 72 – 96 h,  
190 *SpeI* restriction enzyme (5U per 150  $\mu$ L, New England Biolabs) was used [26] and the  
191 electrophoresis conditions comprised switch times of 2 – 6 s at  $15$  °C and 200 V for 37 h.

192 For all the infection experiments, fish were transferred from a stock tank, anaesthetised with  
193 MS-222 (40 ppm; Tricaine methane sulphonate, Sigma) and i.p. injected with 100  $\mu$ L of the  
194 relevant bacterial suspension. Where included, control fish were injected with 100  $\mu$ L of sterile  
195 PBS. Fish were then allocated to respective 30 L aquaria each with water flow of 0.6 – 1.0 L /  
196 min, all other parameters remained the same as described above. Fish were observed at least

197 twice a day for signs of disease for 7-14 days. The pathogens that caused mortalities, were  
 198 recovered from the diseased fish, purified and stored at -80 °C.

199

200 **Table 2.** Bacterial isolates, number of fish and doses used in the different infection experiments  
 201 to assess infectivity, pathogenicity and virulence.

| Infection Experiment | Number of fish i.p. injected | Days observation post challenge | Bacterial species and isolate          | OD <sub>600</sub> / dilution factor | Dose (cfu/ fish)      | No. dead/moribund by termination |
|----------------------|------------------------------|---------------------------------|----------------------------------------|-------------------------------------|-----------------------|----------------------------------|
| Experiment 1         | 6                            | 6                               | <i>aAs</i> type V – TW4/14             | 1.46                                | 9.5 x 10 <sup>7</sup> | 6 (100%)                         |
|                      | 6                            | 6                               | <i>aAs</i> type V – TW187/14           | 1.52                                | 8.5 x 10 <sup>7</sup> | 6 (100%)                         |
|                      | 6                            | 6                               | <i>aAs</i> type V – TW3/14             | 1.49                                | 1.0 x 10 <sup>8</sup> | 6 (100%)                         |
|                      | 6                            | 6                               | <i>Aliivibrio salmonicida</i> TW322/16 | 1.51                                | 5.0 x 10 <sup>4</sup> | 0                                |
|                      | 6                            | 6                               | <i>Vibrio splendidus</i> TW130/16      | 1.45                                | 2.0 x 10 <sup>5</sup> | 0                                |
|                      | 6                            | 6                               | <i>Vibrio ichthyenteri</i> TW319/16    | 1.48                                | 1.0 x 10 <sup>9</sup> | 0                                |
| Experiment 2         | 15                           | 7                               | <i>Aliivibrio salmonicida</i> TW322/16 | >2.5                                | 5.0 x 10 <sup>9</sup> | 2 (13%)                          |
|                      | 15                           | 7                               | <i>Vibrio splendidus</i> TW130/16      | >2.5                                | 3.5 x 10 <sup>9</sup> | 0                                |
|                      | 15                           | 7                               | <i>Vibrio ichthyenteri</i> TW319/16    | >2.5                                | 8.0 x 10 <sup>9</sup> | 0                                |
|                      | 15                           | 7                               | Control - 1x PBS                       | -                                   | -                     | 0                                |
|                      | 15                           | 8                               | <i>aAs</i> type VI – TW164/15          | 2                                   | 3.0 x 10 <sup>9</sup> | 15 (100%)                        |
| Experiment 3         | 12                           | 15                              | <i>aAs</i> type VI – TW164/15          | 2                                   | 3.0 x 10 <sup>9</sup> | 12 (100%)                        |
|                      | 12                           | 15                              | <i>aAs</i> type VI – TW164/15          | 10 <sup>-2</sup>                    | 3.0 x 10 <sup>7</sup> | 12 (100%)                        |
|                      | 12                           | 15                              | <i>aAs</i> type VI – TW184/16          | 2                                   | 1.6 x 10 <sup>9</sup> | 12 (100%)                        |
|                      | 12                           | 15                              | <i>aAs</i> type VI – TW184/16          | 10 <sup>-2</sup>                    | 1.6 x 10 <sup>7</sup> | 12 (100%)                        |
|                      | 12                           | 12                              | <i>Photobacterium indicum</i> TW138/16 | 1.75                                | 3.2 x 10 <sup>9</sup> | 12 (100%)                        |
|                      | 12                           | 12                              | <i>Photobacterium indicum</i> TW138/16 | 10 <sup>-2</sup>                    | 3.2 x 10 <sup>7</sup> | 6 (50%)                          |
|                      | 12                           | 12                              | <i>Photobacterium indicum</i> TW181/16 | 1.89                                | 9.0 x 10 <sup>9</sup> | 12 (100%)                        |
|                      | 12                           | 12                              | <i>Photobacterium indicum</i> TW181/16 | 10 <sup>-2</sup>                    | 9.0 x 10 <sup>7</sup> | 8 (66%)                          |
|                      | 12                           | 25                              | <i>Aliivibrio logei</i> TW242/16       | 2                                   | 1.5 x 10 <sup>9</sup> | 0                                |
|                      | 12                           | 25                              | <i>Aliivibrio logei</i> TW242/16       | 10 <sup>-2</sup>                    | 1.5 x 10 <sup>7</sup> | 0                                |
|                      | 12                           | 25                              | <i>Aliivibrio logei</i> TW186/16       | 2                                   | 1.8 x 10 <sup>9</sup> | 0                                |
|                      | 12                           | 25                              | <i>Aliivibrio logei</i> TW186/16       | 10 <sup>-2</sup>                    | 1.8 x 10 <sup>7</sup> | 0                                |
| Experiment 4         | 15                           | 16                              | <i>aAs</i> type V – TW4/14             | 1.9                                 | 1.0 x 10 <sup>8</sup> | 15 (100%)                        |
|                      | 15                           | 16                              | <i>aAs</i> type V – TW4/14             | 10 <sup>-1</sup>                    | 1.0 x 10 <sup>7</sup> | 13 (87%)                         |
|                      | 15                           | 16                              | <i>aAs</i> type V – TW4/14             | 10 <sup>-2</sup>                    | 1.0 x 10 <sup>6</sup> | 8 (53%)                          |
|                      | 15                           | 16                              | <i>aAs</i> type V – TW4/14             | 10 <sup>-4</sup>                    | 1.0 x 10 <sup>4</sup> | 0                                |
|                      | 15                           | 16                              | Control - 1x PBS                       | -                                   | -                     | 0                                |
|                      | 15                           | 19                              | <i>aAs</i> type VI – TW164/15          | 2                                   | 2.5 x 10 <sup>8</sup> | 1 (7%)                           |
|                      | 15                           | 19                              | <i>aAs</i> type VI – TW164/15          | 10 <sup>-1</sup>                    | 2.5 x 10 <sup>7</sup> | 0                                |
|                      | 15                           | 19                              | <i>aAs</i> type VI – TW164/15          | 10 <sup>-2</sup>                    | 2.5x 10 <sup>6</sup>  | 0                                |
|                      | 15                           | 19                              | <i>aAs</i> type VI – TW164/15          | 10 <sup>-4</sup>                    | 2.5 x 10 <sup>4</sup> | 0                                |
|                      | 15                           | 19                              | Control - 1x PBS                       | -                                   | n/a                   | 0                                |
| Experiment 5         | 15                           | 19                              | <i>aAs</i> type V – TW4/14             | 1.95 dil. 10 <sup>-1</sup>          | 1.0 x 10 <sup>7</sup> | 15 (100%)                        |
|                      | 15                           | 19                              | <i>aAs</i> type V – TW4/14             | 10 <sup>-2</sup>                    | 1.0 x 10 <sup>6</sup> | 8 (53%)                          |
|                      | 15                           | 19                              | <i>aAs</i> type V – TW4/14             | 10 <sup>-3</sup>                    | 1.0 x 10 <sup>5</sup> | 7 (47%)                          |
|                      | 15                           | 19                              | <i>aAs</i> type V – TW4/14             | 10 <sup>-4</sup>                    | 1.0 x 10 <sup>4</sup> | 1 (7%)                           |
|                      | 15                           | 19                              | <i>aAs</i> type V – TW4/14             | 10 <sup>-5</sup>                    | 1.0 x 10 <sup>3</sup> | 0                                |

202



203 **Vaccination**

204 Two groups of 150 fish were tagged and i.p. injected with 0.05 mL of either the test vaccine or  
205 sterile PBS (control group). For this, fish were randomly transferred from their stock tank with  
206 a net into a bucket containing tank water at  $12 \pm 2$  °C. Thereafter, groups of 2-5 fish were  
207 transferred at a time to a further bucket with MS-222 for anaesthesia and tagging. On a clean  
208 worktable each fish was marked using the Visible Implant Elastomer tagging system (VIE,  
209 Northwest marine technology, Inc). Mark colour was determined as orange for mock  
210 vaccinated and blue for the vaccinated fish (Figure 1).

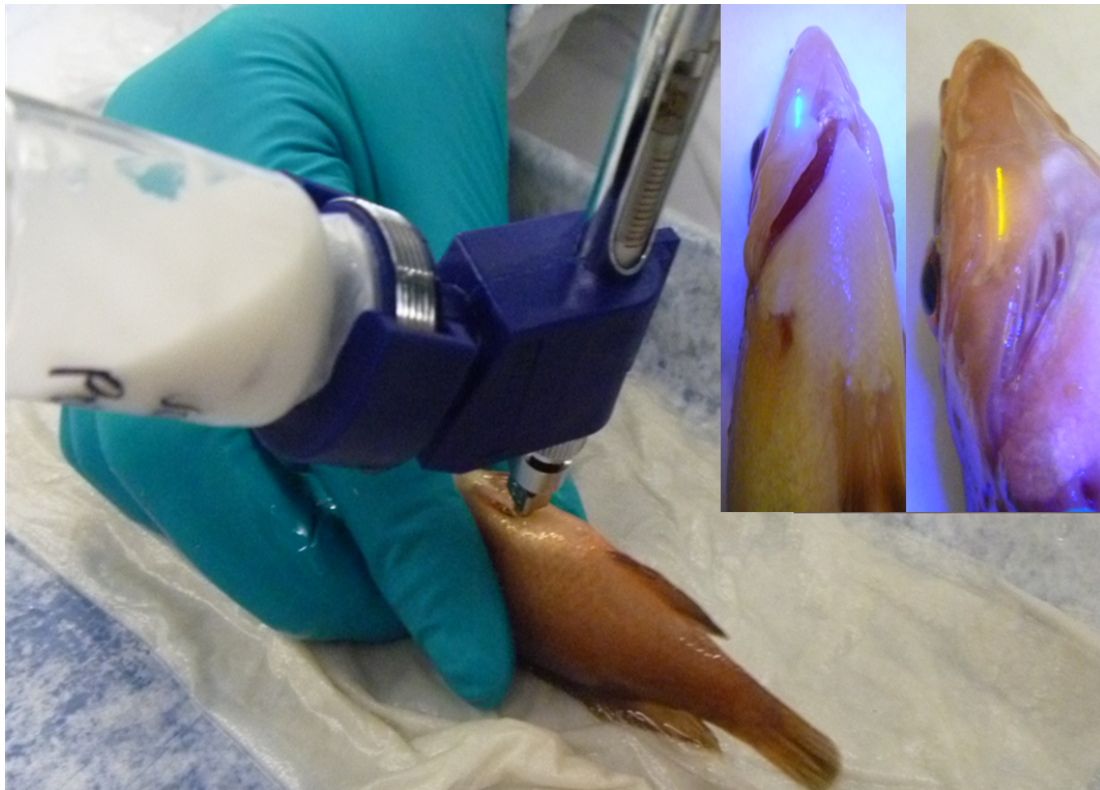

211

212 **Figure 1.** Intrapерitoneal injection vaccination of ballan wrasse with oil-adjuvanted autogenous  
213 vaccine. Inset: wrasse tagged with Visible Implant Elastomer tagging system. Blue for the  
214 vaccinated fish and orange for mock vaccinated.

215 Immediately after tagging each fish was injected with the appropriate treatment using an  
216 automatic gun for the group of vaccinates and a sterile syringe for the mock vaccinates. For  
217 this, fish were i.p. vaccinated through the ventral wall of the coelomic cavity, one pelvic fin  
218 length anterior to the pelvic girdle and transferred directly into their holding tank at  $12 \pm 0.5$   
219 °C to recover (Figure 1). Vaccinated fish were then divided into 4 tanks (300 L with artificial  
220 plastic kelp and sections of plastic pipes to provide hides to the fish), 2 containing 75 fish  
221 vaccinated fish each and 2 tanks containing 75 mock vaccinated fish each.

222 Fish were held for 65 days at  $12 \pm 0.5$  °C (780 DD) and blood samples collected from the  
223 caudal vein on days 31 and 65 post vaccination (prior to challenge) from 15 fish of each tank.  
224 The blood samples were centrifuged immediately after collection at 3,000 x g for 10 min and  
225 serum kept at -20 °C until used for serological analyses.

### 226 **Vaccine efficacy testing**

227 After the immunisation period was completed, vaccinated and control fish were challenged  
228 with the two most virulent strains *i.e.* TW4/14 (*aAs vapA* type V) and TW3/14 (*aAs vapA* type  
229 V) using a tag and mix model with two different doses (pseudo replicate tanks), here referred  
230 as medium and high for isolate TW4/14 and high and very high for isolate TW3/14 as detailed  
231 in Table 3.

**Table 3.** Experimental design of the vaccine efficacy trial and relative percent survival (RPS) results.

| Species and Isolate             | Tank and (n)                  | Dose type | cfu/fish          | RPS (%) |
|---------------------------------|-------------------------------|-----------|-------------------|---------|
| <i>aAs vapA</i> type V (TW4/14) | T03-10; 90 fish<br>(45v +45c) | Medium    | $1.0 \times 10^6$ | 95      |
| <i>aAs vapA</i> type V (TW4/14) | T03-09; 90 fish<br>(45v +45c) | High      | $1.0 \times 10^7$ | 91      |
| <i>aAs vapA</i> type V (TW3/14) | T03-08; 90 fish<br>(45v +45c) | High      | $1.0 \times 10^7$ | 79      |
| <i>aAs vapA</i> type V (TW3/14) | T03-07; 90 fish<br>(45v +45c) | Very high | $1.0 \times 10^8$ | 20      |

V= vaccinated; C= control

232

### 233 **Infection and vaccination experiments: observations and sampling**

234 For all the infection experiments, fish were observed at least twice a day. Diseased fish were  
235 classified as moribund or near moribund (humane endpoints) based on clinical signs (typically  
236 extreme lethargy when approached with a hand net). They were then euthanised by overdose  
237 of anaesthetic followed by confirmation of death by brain destruction, a UK Animals  
238 (Scientific Procedures) Act 1986 Amended Regulations (SI 2012/3039) Schedule 1 approved  
239 method (S1-M). All euthanised and dead fish were recorded throughout the experiments and  
240 accounted for posterior statistical analyses. To confirm specific mortalities, all moribund fish  
241 were necropsied, checked for gross pathology and sampled for bacteriology and histopathology  
242 as previously described. The challenge experiments were typically concluded when there was  
243 a period of at least five days with no mortalities. At the end of the vaccine efficacy trial, all  
244 surviving fish were killed by S1-M and blood sampled and processed as described before to  
245 measure specific antibody levels in the serum by ELISA.

246 All the experimental infections and vaccine efficacy tests were performed at 15 °C. Water  
247 temperatures were gradually increased over an acclimation period of 5-7 days prior to  
248 challenge.

### 249 **Specific IgM response**

250 An indirect enzyme-linked immunosorbent assay (ELISA) was developed to detect and  
251 estimate the levels of specific anti-*aAs* IgM in the ballan wrasse sera pre-vaccination and when  
252 the immunisation period was completed. Six samples including 2 replicates from each group  
253 were used for assessment of specific antibody responses by ELISA.

254 Antibody titres were determined according to the protocols outlined by [28] with modifications.  
255 Briefly, 96 – well ELISA plates (Immulon 4HBX, Thermo Scientific) were coated with 50 µL  
256 of 0.05% w/v poly – L– lysine in carbonate – bicarbonate buffer (0.05 M carbonate-bicarbonate  
257 pH 7.4, Sigma-Aldrich, St.Louis, UK) and incubated for 60 min at room temperature (RT).  
258 Plates were then washed 2 times with a low salt wash buffer (LSWB) (0.02 M Trizma base,  
259 0.38 M NaCl, 0.05% Tween-20, pH 7.3). Bacteria i.e. *aAs* type V isolate TW4/14, 100 µL at  
260  $10^8$  cfu/mL (OD<sub>600</sub> 1.0), were then added to each well and plates were incubated overnight at  
261 4 °C. The bacteria were previously prepared by growing them on TSB at 22 °C for 48 h with  
262 continuous shaking at 150 rpm and washed 2 times with PBS, resuspended and adjusted to an  
263 OD<sub>600</sub> 1.0 prior to 96 – well plates inoculation. Glutaraldehyde (50 µL, 0.05% (v/v)) diluted in  
264 PBS was added to the wells of the ELISA plate to fix the antigen, incubated 20 min at RT and  
265 plates were washed 3 times with LSBW.

266 The plates were then post-coated with 3% w/v casein in distilled water (250 µL) to block non-  
267 specific binding sites and incubated for 180 min at RT. The supernatant was decanted and  
268 plates were stored at -20 °C for up to 3 weeks. LSBW was used to wash the plate 3 times and  
269 100 µL of hydrogen peroxide (H<sub>2</sub>O<sub>2</sub>; 0.3% of 10% stock solution in 10% methanol) was added  
270 to each well to quench endogenous peroxidase activity of the bacteria and incubated for 30 min  
271 at RT.

272 Diluted serum (100 µL per well; from 1:50 to 1:800) in 0.5% casein (w/v) and in PBS, were  
273 added to the plates and incubated for 1 h at RT. Plates were washed 5 times with high salt  
274 wash buffer (HSWB) (0.02 M Trizma base, 0.5 M NaCl, 0.1% Tween-20, pH 7.4) and were  
275 incubated with the last HSWB wash for 5 min at RT.

276 Anti – Asian sea bass IgM MAbs (ADL, Stirling, UK) (shown to cross react with ballan wrasse  
277 IgM) diluted 1/50 with 0.01% Bovine Serum Albumin (BSA) in PBS was then added to each

278 well (100  $\mu$ L), and incubated for 1 h at RT. The plates were then washed 5 times in HSWB as  
279 described above. Goat anti – mouse – horseradish peroxidase (HRP) conjugate (Sigma-Aldrich,  
280 UK) diluted 1/4000 with 0.01% BSA in LSWB was then added to the plates. Chromogen in  
281 substrate buffer (prepared by adding 150  $\mu$ L of chromogen 42 mM trimethyl-benzidine, TMB  
282 to 15 mL of substrate buffer containing 5  $\mu$ L H<sub>2</sub>O<sub>2</sub> in 6 mL of 50% acetic acid) was then added  
283 (100  $\mu$ L / well) for assay development.

284 The plates were incubated for 3 – 5 min at RT and the reaction stopped by adding 50 $\mu$ L sulfuric  
285 acid (2 M H<sub>2</sub>SO<sub>4</sub>). The absorbance was measured at OD<sub>450</sub> using a 96 – well plate  
286 spectrophotometer (Biotek Instruments, Friedrichshall, Germany). The sensitivity threshold of  
287 the assay was determined as 3x the absorbance value of wells containing PBS (background  
288 absorbance). Samples above this value were considered positive for specific antibodies.

### 289 **Statistical analyses**

290 The efficacy/potency of the vaccine was assessed by calculating the relative percent survival  
291 (RPS) which indicates the proportional percentage between the cumulative (cm) morbidities  
292 of vaccinated group and cumulative morbidities of mock vaccinated group using the equation  
293 below [29].

$$294 \quad RPS = \left[ 1 - \left( \frac{\% \text{ mortality in vaccinated fish}}{\% \text{ mortality in non-vaccinated fish}} \right) \right] \times 100 \%$$

295 Minitab 18 was used to produce Kaplan – Meier survival curves and perform log-rank non-  
296 parametric tests (significance level  $p < 0.05$ ) for survival comparisons. Antibody responses in  
297 serum samples of vaccinated and non – vaccinated ballan wrasse were tested for normality  
298 (Anderson-Darling test) and homogeneity of variance (Levene’s test). Kruskal-Wallis non –  
299 parametric test was used for dose response assessment in relation to antibody titres while a  
300 pairwise comparison (Mann Whitney-U test (CI = 95%)) was conducted between the antibody  
301 responses.

### 302 **Ethical statement**

303 Bacterial infection and vaccination procedures were performed under the authority of UK  
304 Government Home Office project licences, following approval by the Animal Welfare and  
305 Ethical Review Body (AWERB) at the Centre for Environment, Fisheries and Aquaculture  
306 Science (Cefas) and University of Stirling. Ballan wrasse were treated in accordance with the  
307 Animals (Scientific Procedures) Act 1986 Amended Regulations (SI 2012/3039).

308

## 309 RESULTS

### 310 Infection experiments

311 In the first two infection experiments, injection with high doses of *aAs* type V isolates TW3/14,  
312 TW4/14 and TW187/14 and type VI isolate TW164/15 resulted in 100% moribundity/mortality  
313 by 7 days post challenge (Table 2). Clinical signs were first recorded at 4 days post infection  
314 (dpi) for both *vapA* types and 100% morbidities achieved by 4 and 8 dpi, for *vapA* types V and  
315 VI respectively. In all experiments, the *aAs* isolates were recovered from moribund fish as pure  
316 cultures (punctate whitish to greyish colonies) from swabbed internal organs. The *aAs* type VI  
317 isolate tested produced a diffusible pigment, (brown on TSA and grey on BA) that became  
318 more evident after five days incubation (Supplementary File1). A representative isolate from  
319 each strain was stored at -80 °C under Cefas bacterial culture collection codes 17032, 17033  
320 and 17034 after being in vivo passaged in fish.

321 The infections performed with *Aliivibrio salmonicida*, *Allivibrio logei*, *Vibrio splendidus* and  
322 *Vibrio ichthyenteri* did not cause any sign of disease or mortalities after 7 dpi in infection  
323 experiment 1 (Table 2). In infection experiment 2, only *Aliivibrio salmonicida* caused 2  
324 mortalities (13%) on day 3 and the other three were not pathogenic.

325 In infection experiment 3 (Table 2), fish infected with a medium dose of *aAs vapA* type VI  
326 isolates TW184/16 ( $1.6 \times 10^7$  cfu/fish) and TW164/15 ( $3 \times 10^7$  cfu/fish) resulted in mortalities of  
327 25% and 33% respectively, while a high dose ( $10^9$  cfu/fish) caused 100% mortalities for both  
328 isolates. The two *aAs* type VI isolates presented brown pigment as described before. Signs of  
329 disease presented more rapidly for isolate TW184/16 for medium (6 dpi) and high (2 dpi) dose  
330 but similar to those of TW164/15 (7 and 3 dpi, respectively) (Supplementary File 2). Morbid  
331 fish showed some signs of reduced appetite often followed by imbalance, lethargy and full loss  
332 of equilibrium. Gross external pathology included ascites, and occasionally haemorrhaging at  
333 the injection site, internally liquefaction of organs and white deposits in the peritoneum  
334 (Supplementary File 3). More liquefaction was noted with TW184/16 than TW164/16.  
335 Interestingly the bacterium was not isolated from any survivor fish challenged with medium  
336 dose at termination on 14 (TW184/16) and 16 (TW164/15) dpi and there were no any obvious  
337 external or internal signs of disease in them.

338 The *Photobacterium indicum* isolates TW138/16 and TW181/16 both caused 11 (92%)  
339 overnight mortalities when administered at high doses of  $3.2 \times 10^9$  and  $9 \times 10^9$  cfu/fish  
340 respectively. The remaining fish injected with a high dose of TW138/16 was removed on day  
341 3 post infection while the last fish injected with TW181/16 were euthanised on welfare grounds

342 at day 6 post infection (Supplementary File 4). For the *Photobacterium indicum* challenges  
343 with medium doses ( $3.2 \times 10^7$  and  $9 \times 10^7$  cfu/fish), of isolates TW181/16 and TW138/16 resulted  
344 in 8/12 and 6/12 mortalities respectively by day 3 post challenge (Supplementary File 4). The  
345 remaining fish (n= 4) in the tank challenged with TW181/16 were terminated at day 9 post  
346 infection as no morbidities occurred for 3 days and all presented lesions at the injection site  
347 during the daily observations. In the tank infected with medium dose of isolate TW138/16 a  
348 single dead fish with a large lesion around the injection site was removed on day 9, while  
349 monitoring of the remaining fish (n= 6) continued. On day 16 post infection all surviving fish  
350 (n=6) presented severe ventral lesions at the i.p. injection site (Supplementary File 5) and some  
351 of these lesions extended into the cavity and for this reason the experiment was terminated.  
352 Morbid fish infected with *Photobacterium indicum* showed a reduced feeding response often  
353 followed by imbalance, lethargy and full loss of equilibrium with a very rapid progression (<  
354 24 h) of the signs. During the necropsies, the majority of the fish had ascites, liquefaction of  
355 organs and swelling coelomic cavity due to ascites. Internally, haemorrhages or lesions were  
356 noted and the severity of these progressed over time.

357 Additional testing of isolate a4s type V (TW4/14) in infection experiments 4 and 5 confirmed  
358 this organism was virulent. Morbidities were recorded within 2 dpi with the high dose ( $10^8$   
359 cfu/fish) and 100% mortalities were reached by day 4. A dose of  $10^7$  cfu/fish reached a  
360 maximum of 87% mortality by day 6 post infection, while no signs of disease or morbidities  
361 were noted for fish challenged with the lowest dose ( $10^4$  cfu/fish) (Supplementary File 6).  
362 Similar results were obtained in the second pre-test, with 53% for group exposed to  $10^6$  cfu/fish  
363 and only 7% in the group exposed to  $10^4$  cfu/fish. (Supplementary File 7). The predicted LD<sub>60</sub>  
364 based on these experiments was between  $10^6$  cfu/fish (53%) and  $10^7$  cfu/fish (87%), with  $10^7$   
365 cfu/fish selected as one of the doses for the vaccine efficacy trials.

366 For the additional testing undertaken with a4s type VI (TW164/15) in infection experiment 4,  
367 only a single morbidity occurred at 3 dpi, while the rest of the fish showed no visual signs of  
368 disease or adverse behaviour. The trial was terminated at 20 dpi and fish (n= 6) sampled for  
369 bacteriology. All inoculated plates were considered negative as no significant bacterial colonies  
370 were observed. For these reasons this isolate was not used for the vaccine testing and a  
371 replacement isolates was selected as described below.

## 372 **Virulence determination**

373 LD<sub>50</sub> values for the different isolates by day 8 post infection were calculated based on results  
374 from all the infection experiments. Atypical *Aeromonas salmonicida vapA* type V isolate

375 TW4/14 was the most virulent followed by a*As vapA* type V isolate TW3/14, *Photobacterium*  
376 *indicum* and a*As vapA* type VI. The a*As vapA* type V isolates (TW3/14, TW4/14 and  
377 TW187/14) were chosen for macrorestriction analysis using PFGE to select a replacement  
378 isolate for a*As vapA* type VI (TW164/15) which was not virulent during experiment 3.  
379 Differences were observed in the restriction sites for isolate TW3/14 in comparison to TW4/14  
380 and TW187/14 (Figure 2) which may explain the differences in virulence mentioned above.  
381 The *Aliivibrio logei*, *Vibrio splendidus*, *Aliivibrio salmonicida* and *Vibrio ichthyenteri* were  
382 not pathogenic. The average of the 3 estimations for a*As vapA* type V (TW4/14) was  $3.6 \times 10^6$   
383 cfu/fish. The average of the 2 estimations for *Photobacterium indicum* was  $2.2 \times 10^7$  cfu/fish. A  
384 comparison of all the LD<sub>50</sub> values of the different isolates is presented in Table 4.

385

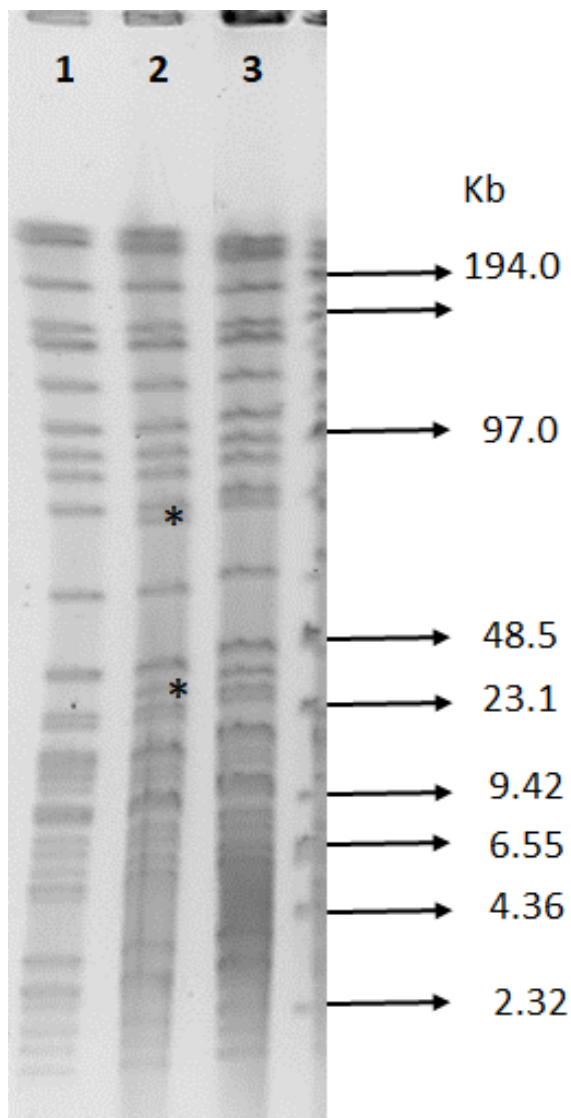

**Figure 2.** Pulsed-field gel electrophoresis patterns of *Aeromonas salmonicida vapA* type V isolates TW4/14, TW 187/14 and TW 3/14 restricted with *SpeI* enzyme (New England Labs, UK). From left to right, TW 3/14 (position 1), TW 4/14 (position 2) and TW 187/14 (position 3). Molecular marker mixture of lambda DNA-Hind III fragments and lambda concatamer;  $48 \pm 5$  kb (Low Range PFG Marker, New England Labs, UK). Notice the difference between pulsotype profiles for isolates TW 3/14 and TW 4/14 and TW 187/14 (asterisk).

386

387

388

**Table 4.** Lethal dose 50% (LD<sub>50</sub>) of 6 bacterial species used in the trials by day 8 post infection.

| Bacterial species                             | Isolate  | LD <sub>50</sub> (cfu/fish) |
|-----------------------------------------------|----------|-----------------------------|
| Atypical <i>Aeromonas salmonicida</i> type V  | TW4/14*  | 2.0 x 10 <sup>5</sup>       |
| Atypical <i>Aeromonas salmonicida</i> type V  | TW4/14   | 2.8 x 10 <sup>6</sup>       |
| Atypical <i>Aeromonas salmonicida</i> type V  | TW4/14** | 6.1 x 10 <sup>6</sup>       |
| Atypical <i>Aeromonas salmonicida</i> type V  | TW3/14** | 1.6 x 10 <sup>7</sup>       |
| <i>Photobacterium indicum</i>                 | TW181/16 | <3.2 x 10 <sup>7</sup>      |
| <i>Photobacterium indicum</i>                 | TW138/16 | 1.3 x 10 <sup>8</sup>       |
| Atypical <i>Aeromonas salmonicida</i> type VI | TW184/16 | 3.4 x 10 <sup>8</sup>       |
| Atypical <i>Aeromonas salmonicida</i> type VI | TW164/15 | 5.3 x 10 <sup>8</sup>       |
| <i>Aliivibrio logei</i>                       | TW242/16 | >1.5 x 10 <sup>9</sup>      |
| <i>Aliivibrio logei</i>                       | TW186/16 | >1.8 x 10 <sup>9</sup>      |
| <i>Vibrio splendidus</i>                      | TW130/16 | >3.0 x 10 <sup>9</sup>      |
| <i>Aliivibrio salmonicida</i>                 | TW322/16 | >5.0 x 10 <sup>9</sup>      |
| <i>Vibrio ichthyoenteri</i>                   | TW319/16 | >8.0 x 10 <sup>9</sup>      |

(\*) passaged isolate used in dose trials; (\*\*) data from mock vaccinated.

#### 389 **Vaccine efficacy**

390 Significant protection was demonstrated with vaccinated fish experiencing significantly lower  
391 mortalities than control fish when challenged with aAs type V from isolates TW4/14 and  
392 TW3/14. First morbidities were recorded at 5 dpi (TW3/14) and 6 dpi (TW4/14) in the mock-  
393 vaccinated groups, and 7 dpi (TW3/14) and 15 dpi (TW4/14) in the vaccinated groups (Figure  
394 3A, B).

395 Mortalities were significantly higher for mock-vaccinated fish challenged with either of the  
396 two isolates over a period of 24 days (Figure 3A, B). Isolate TW3/14 at a very high dose of  
397 1x10<sup>8</sup> cfu/fish resulted in 96% mortality relative to the control fish and 34% mortality relative  
398 to the vaccinated group. With the same isolate, a dose of 10<sup>7</sup> cfu/fish caused 84% mortality  
399 relative to the control groups and only 18% relative to the vaccinated group. Isolate TW4/14,  
400 at a high dose of 10<sup>7</sup> cfu/fish, caused 100% mortalities relative to the control and only 9%  
401 relative to the vaccinated group while a medium dose of 10<sup>6</sup> cfu/fish caused 44% in the control  
402 groups and only 2% to the vaccinated fish.

403 The RPS values in the ballan wrasse challenged with isolate TW4/14 at medium and high doses  
404 were 95% (10<sup>6</sup> cfu/fish) and 91% (10<sup>7</sup> cfu/fish), respectively. The group exposed to strain  
405 TW3/14 had an RPS of 79% with the high dose of 10<sup>7</sup> cfu/fish but a low RPS (20%) was  
406 recorded for the group injected with the very high challenge dose (10<sup>8</sup> cfu/fish) (Table 4).  
407 Despite the low RPS, the survival of vaccinated fish in this group was still significantly higher  
408 when compared with the mock vaccinated group (Figure 3B).



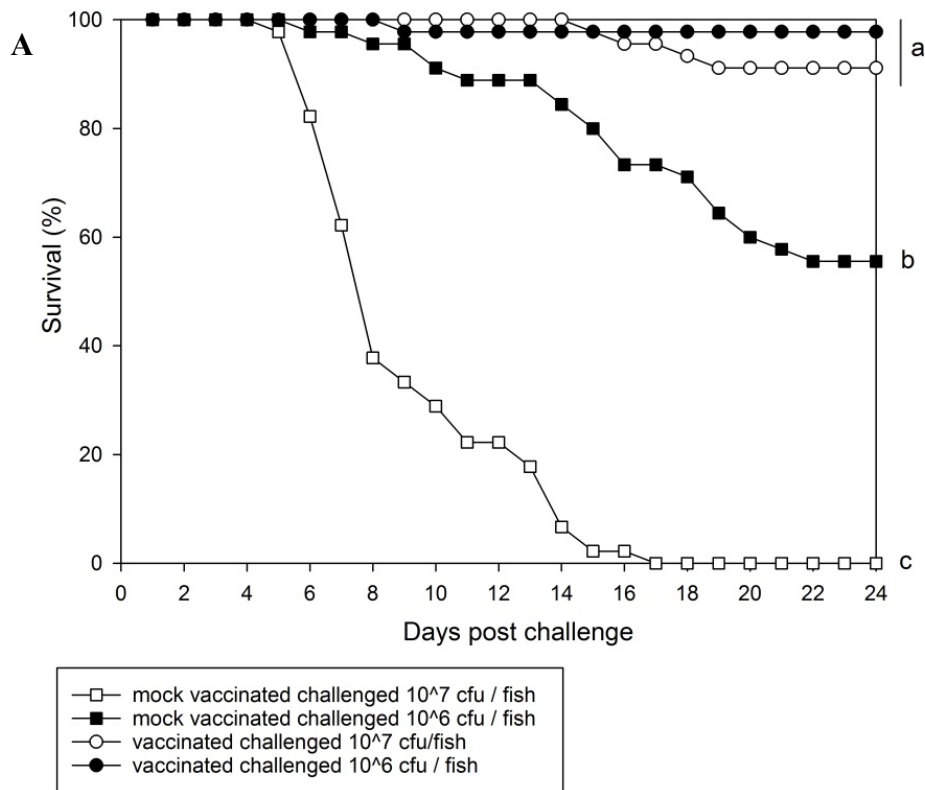

409

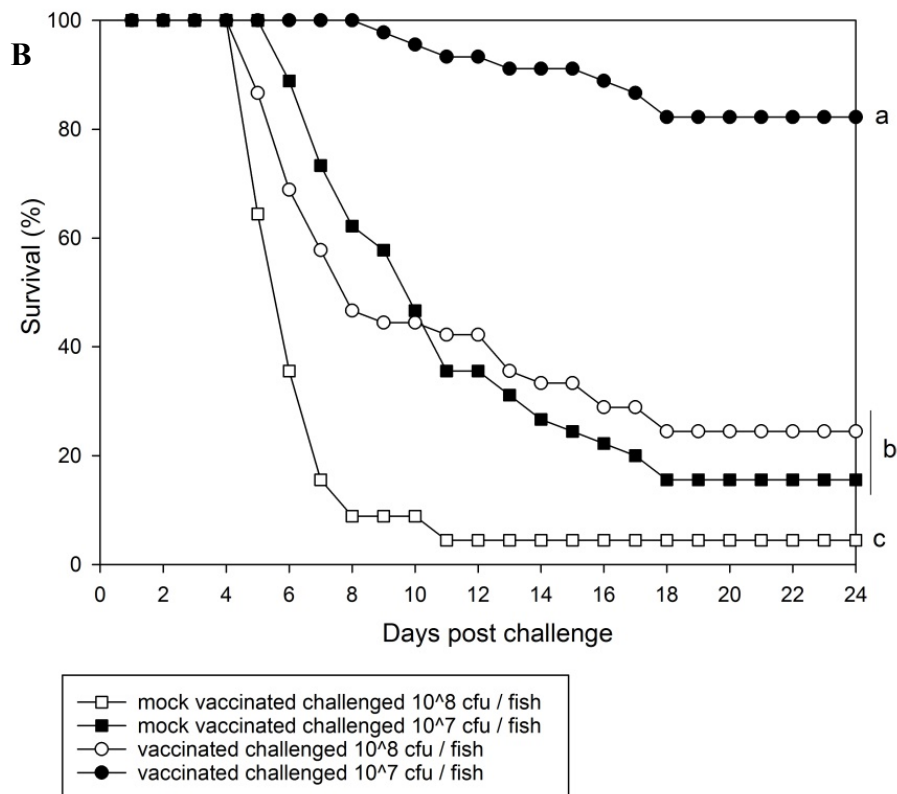

410

411 **Figure 3.** Survival (%) of i.p. injected vaccinated and non – vaccinated ballan wrasse  
 412 challenged with A) a4s type V (isolate TW3/14) at high and very high doses and B) a4s type  
 413 V (isolate TW4/14) at medium and high doses. Letters represents statistical significance ( $p <$   
 414 0.05).

415 **Specific IgM response**

416 Non – specific binding was observed in the preliminary results (Supplementary File 8). This  
417 was reduced when plates were treated with 0.3% hydrogen peroxide to quench endogenous  
418 peroxidase activity of the bacteria and when 0.5% casein and 0.01% BSA were included in the  
419 fish serum and Anti – Asian sea bass IgM MAbs, respectively.

420 A very weak antibody response was noted for serum samples collected from mock-vaccinated  
421 fish (controls) prior to challenge and these were considered negative. The vaccinated fish had  
422 significantly higher mean antibody titres at all sera dilutions in contrast to mock-vaccinated  
423 fish (Figure 4).

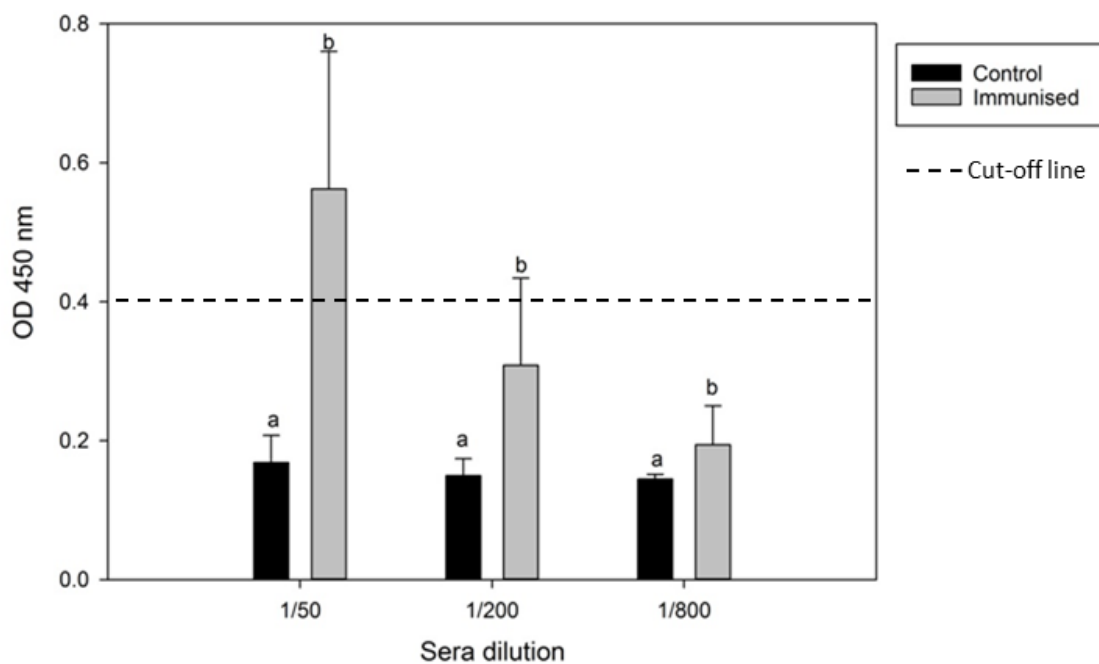

424 **Figure 5.** Ballan wrasse specific antibody (IgM) response to aAs pre-vaccination (control, n=  
425 6 samples x 2 replicates) and after immunisation period was completed (780 DD after i.p.  
426 vaccination, n= 6 replicates x 2 replicates). Letters represents statistical significance (p < 0.05).

428 **DISCUSSION**

429 In the present study, the virulence of aAs type V and VI, *Aliivibrio logei*, *Aliivibrio*  
430 *salmonicida*, *Vibrio splendidus*, *Vibrio ichthyoenteri* and *Photobacterium indicum* were  
431 assessed. The results obtained confirmed that aAs *vapA* type V was the most pathogenic of all  
432 the bacterial species (followed by *Photobacterium indicum*, aAs VI and the rest of the  
433 *Vibrionaceae*). Importantly, the vaccine tested was highly protective against aAs type V and  
434 significantly higher titres of specific systemic IgM were detected in vaccinated fish when  
435 compared to controls.

436 The virulence studies confirmed that *aAs vapA* type V (from both isolates tested) were highly  
437 virulent in ballan wrasse when i.p. injected. The RPS obtained with medium and high doses  
438 for *vapA* type V from isolate TW4/14 (95% and 91%, respectively) and high dose of *vapA* type  
439 V from isolate TW3/14 (79%) strains, confirmed the effectiveness of the injection vaccine  
440 against homologous strains of *aAs* and were in agreement with previous results conforming  
441 that ballan wrasse can be effectively immunised by i.p. injection against this pathogen [17].  
442 When vaccinated ballan wrasse were challenged with a very high dose ( $10^8$  cfu/fish) of the  
443 strain TW3/14 RPS was only of 20% suggesting that high challenge dose may have suppressed  
444 or overwhelmed protective memory responses. This highlights the relevance of biosecurity and  
445 good farming practices to maintain the pathogens challenge pressure as low as possible during  
446 the production cycle.

447 A specific antibody response (IgM) to the vaccine was measured in immunised fish at 780 DD  
448 which was significantly higher compared to non-vaccinated fish. The high RPS levels in  
449 vaccinated fish and specific antibody response following vaccination are indicators that the  
450 vaccine indeed triggered a specific protective humoral response against *aAs*. Similar responses  
451 have been induced in other species immunised with typical or atypical strains of *As*, such as  
452 lump sucker [30, 31], Atlantic salmon [32, 33], rainbow trout [34] and spotted wolffish [35]. A  
453 high quantity of cytoplasmic peroxidases (*e.g.* thiol peroxidase) have previously been reported  
454 in *A. salmonicida* cells [36] and high antigen endogenous peroxidase activity appeared to cause  
455 substantial background during ELISA development. This background was quenched using  
456 hydrogen peroxide prior to antibody-antigen complexing. However, a high absorbance  
457 threshold of the ELISA could not be avoided using our cut-off criteria ( $3 \times$  background OD =  
458 0.4), thus a 1/50 test titre was the most preferable to use to determine positive antibody  
459 responses to *aAs* vaccination. Nonetheless, the titre of antibodies was consistently higher in  
460 vaccinated fish up to and including a dilution of 1/800. These results suggested that antibodies  
461 might be involved in protection against *aAs*.

462 Interestingly, differences in virulence were observed for two atypical *Aeromonas salmonicida*  
463 *vapA* type V isolates (TW3/14 and TW4/14), with the latter being the most virulent.  
464 Microrestriction and PFGE analysis corroborated these results, indicating small but potentially  
465 important genomic differences between isolates. Atypical *Aeromonas salmonicida* isolates  
466 heterogeneity has been previously assessed with the same method [26]. Characterisation of all  
467 the available *aAs vapA* types for ballan wrasse by PFGE will be beneficial to select isolates for  
468 future vaccine formulations.

469 The *vapA* VI isolates appeared less virulent than *aAs* type V and similar results were reported  
470 for Norwegian *aAs* type V and VI isolates [17]. In that study *aAs* type V induced high  
471 mortalities (75 – 89% morbidities) in 50 g ballan wrasse when i.p. injected with  $10^7$  cfu /fish  
472 and also by cohabitation (51%). The type VI isolates were less virulent, in particular by  
473 cohabitation (8%) than i.p. injection (70 – 85%). Interestingly, in the present study, survivor  
474 fish infected with *aAs* type VI at a medium dose ( $10^7$  cfu / fish) did not show any obvious  
475 external or internal signs of the disease and no bacteria were recovered from those fish  
476 suggesting that ballan wrasse were able to clear the infection. This is in agreement with a  
477 previous study that reported similar responses in survivors from groups infected with *aAs* type  
478 V and VI [17].

479 The *Aliivibrio logei*, *Vibrio splendidus* and *Vibrio ichthyenteri* isolates were not pathogenic  
480 to ballan wrasse by i.p. injection even when very high challenge doses were administered.  
481 *Aliivibrio salmonicida* was the only pathogen that caused mortalities (13%) but only when very  
482 high infection dose of  $5 \times 10^9$  cfu/fish was administered.

483 The *aAs vapA* type VI isolates occasionally displayed a peculiar alternative morphology that  
484 included the presence of large greyish and small transparent colonies (Supplementary File 9).  
485 Previous reports have documented this phenomenon associated with variable expression of a  
486 functional A-layer and consequently with variable virulence [22, 37-41]. Although in the  
487 present study, the inclusion of isolates displaying such alternative morphology was generally  
488 avoided, this should not be ruled out as a possible explanation behind the lack of virulence  
489 observed in this experiment.

490 In previous reports of experimental infections with *aAs* type VI isolates in cleaner fish,  
491 lump sucker succumbed to disease at lower doses of  $2 \times 10^3$  cfu/mL (bath) and  $4 \times 10^4$  cfu /fish  
492 (i.p. injection) after exposure [18]. Other fish species like spotted wolffish also experienced  
493 high mortalities with low doses of *aAs* ( $10^3$  and  $10^4$  cfu / mL) by i.p. injection [8, 15]. In  
494 contrast, turbot required very high doses ( $10^8$  and  $10^{10}$  cfu / mL) for mortalities to be induced  
495 by i.p. injection [16]. As suggested previously, there is a strong association between host  
496 species and *vapA* type and it is possible that *vapA* type V is more strongly associated with  
497 wrasse than lumpfish and vice versa for type IV [42].

498 This study is the first experimental confirmation that *Photobacterium indicum* can be  
499 pathogenic towards wrasse, through fulfilment of Koch's postulates. *Photobacterium indicum*  
500 was regularly isolated from diseased ballan wrasse during disease surveys in Scotland and it  
501 was linked to histopathological lesions [4]. There are no previous reports on fish susceptibility

502 to *Photobacterium indicum* although it has been isolated from moribund American lobster  
503 (*Homarus americanus*) associated with stress and has been reported as an opportunistic  
504 pathogen for this crustacean species [43, 44]. In cleaner fish, *Photobacterium* sp. was recently  
505 recovered from lump sucker experiencing mortalities due to *Pseudomonas anguilliseptica*  
506 under rearing conditions in Scotland [45]. The pathogenicity results for *Photobacterium*  
507 *indicum* obtained in the present study need to be treated with caution as disease was induced  
508 only via i.p. injection which bypasses the natural protective mucosal barriers of the host e.g.  
509 skin, gills and gastrointestinal tract [46, 47]. Signs of disease and gross pathology for  
510 *Photobacterium indicum* were similar to those seen with aAs with moribund fish showing  
511 reduced feeding response often followed by imbalance, lethargy and full loss of equilibrium.  
512 The peritoneal cavity of the diseased fish was extended (ascites) and internally, liquefaction  
513 was observed in all the organs. Granulomatous formations were seen in livers of moribund fish  
514 infected with aAs which concurred with previous reports [17]. This needs to be considered  
515 when performing differential diagnosis based on gross pathology and clinical signs. Ventral  
516 lesions at the i.p. injection site were observed on survivor fish, which may be related to  
517 localised immune responses at the injection site [48, 49].

## 518 CONCLUSIONS

519 This study developed an i.p. injection challenge model was for ballan wrasse against Scottish  
520 aAs *vapA* type V isolates and this was used to test the efficacy of an injectable autogenous  
521 multivalent vaccine. The vaccination results obtained in the current study are very encouraging  
522 as they confirmed i.p. vaccination can be used as means to control and potentially eliminate  
523 morbidities in ballan wrasse hatcheries and cage sites due to aAs *vapA* type V and likely other  
524 *vapA* types. The vaccine tested was highly protective against medium and high challenge doses  
525 of aAs type V from two different isolates (RPS 79-95%) and significantly higher titres of  
526 specific systemic IgM were detected in vaccinated fish when compared to controls. In addition,  
527 this study provided important new data on the pathogenicity and virulence of routinely  
528 recovered bacterial species from diseased ballan wrasse. The pathogenicity and virulence of  
529 *Photobacterium indicum* to ballan wrasse is reported for the first time. Atypical *Aeromonas*  
530 *salmonicida* type V isolate TW4/14 was the most virulent pathogen followed by aAs type V  
531 isolate TW3/14, *Photobacterium indicum* and atypical aAs type VI (including isolate from  
532 lump sucker). The *Vibrio* spp. and *Aliivibrio* spp. were not pathogenic by i.p. injection to the  
533 ballan wrasse population tested. Further work is needed to assess the efficacy of vaccination  
534 against other isolates that have proven to be pathogenic such as aAs type VI and  
535 *Photobacterium indicum* and to explore the feasibility of immersion vaccination strategies as

536 the species encounters the pathogens at earlier life stage (< 25 g) and this immunisation route  
537 is desirable for juvenile ballan wrasse in the hatcheries. In addition, full characterisation should  
538 be performed on *aAs* isolates within the same *vapA* types.

#### 539 **ACKNOWLEDGEMENTS**

540 The authors would like to thank Otterferry Seafish Ltd. for the provision of the fish and the  
541 aquarists and bacteriology team at Cefas for their technical assistance during the trial.

#### 542 **FUNDING INFORMATION**

543 This project was co-funded by the Scottish Aquaculture Innovation Centre (SAIC), Mowi,  
544 Scottish SeaFarms, BioMar and University of Stirling (Grant number: SL-2015-01; PI HM  
545 with JGR-P recruited as a Postdoctoral Research Assistant and AP as a PhD student).  
546 Additional support was provided by Cefas Seedcorn.

#### 547 **CONFLICTS OF INTEREST**

548 The authors declare no conflicts of interests

#### 549 **REFERENCES**

- 550 [1] B. Austin, D.A. Austin, Aeromonadaceae representative (*Aeromonas salmonicida*),  
551 Bacterial fish pathogens, Springer 2016, pp. 215-321.
- 552 [2] A.J. Brooker, A. Papadopoulou, C. Gutierrez, S. Rey, A. Davie, H. Migaud, Sustainable  
553 production and use of cleaner fish for the biological control of sea lice: recent advances and  
554 current challenges, *Veterinary Record* 183(12) (2018) 383.
- 555 [3] B. Hjeltnes, B. Bang-Jensen, G. Bornø, A. Haukaas, C.S. Walde, The Health Situation in  
556 Norwegian Aquaculture 2018, Norwegian Veterinary Institute (2019) 132.
- 557 [4] A. Papadopoulou, T.S. Wallis, J.G. Ramirez-Paredes, S.J. Monaghan, A. Davie, H. Migaud,  
558 A. Adams, Atypical *Aeromonas salmonicida vapA* type V and *Vibrio* spp. are predominant  
559 bacteria recovered from ballan wrasse *Labrus bergylta* in Scotland, *Diseases of aquatic*  
560 *organisms* In press (2020).
- 561 [5] P.J. Midtlyng, Vaccination against Furunculosis, in: R. Gudding, A. Lillehaug, Ø. Evensen  
562 (Eds.), *Fish Vaccination*, John Wiley & Sons, Ltd, Chichester, 2014, pp. 185-199.
- 563 [6] B. Björnsdóttir, S. Gudmundsdóttir, S. Bambil, B. Gudmundsdóttir, Experimental infection  
564 of turbot, *Scophthalmus maximus* (L.), by *Aeromonas salmonicida* subsp. *achromogenes* and

- 565 evaluation of cross protection induced by a furunculosis vaccine, *Journal of Fish Diseases* 28(3)  
566 (2005) 181-188.
- 567 [7] V. Lund, L.M. Jenssen, M.S. Wesmajervi, Assessment of genetic variability and relatedness  
568 among atypical *Aeromonas salmonicida* from marine fishes, using AFLP-fingerprinting,  
569 *Diseases of aquatic organisms* 50(2) (2002) 119-126.
- 570 [8] V. Lund, H. Mikkelsen, M.B. Schröder, Comparison of atypical furunculosis vaccines in  
571 spotted wolffish (*Anarhicas minor* O.) and Atlantic halibut (*Hippoglossus hippoglossus* L.),  
572 *Vaccine* 26(23) (2008) 2833-2840.
- 573 [9] P. Pylkkö, Atypical *Aeromonas salmonicida*-infection as a threat to farming of arctic charr  
574 (*Salvelinus alpinus* L.) and european grayling (*Thymallus thymallus* L.) and putative means to  
575 prevent the infection, University of Jyväskylä 2004.
- 576 [10] Y. Attia, I. Schmerold, A. Hönel, The legal foundation of the production and use of herd-  
577 specific vaccines in Europe, *Vaccine* 31(36) (2013) 3651-3655.
- 578 [11] E.M.A. CMDv, Recommendations for the manufacture, control and use of nactivated  
579 autogenous  
580 veterinary vaccines within the EEA, London 2017, p. 14.
- 581 [12] S.R. Haskell, K. Carberry-Goh, M.A. Payne, S.A. Smith, Current status of aquatic species  
582 biologics, *J Am Vet Med Assoc* 225(10) (2004) 1541-4.
- 583 [13] M. Saléry, Autogenous vaccines in Europe: national approaches to authorisation, (2017).
- 584 [14] B.K. Gudmundsdóttir, B. Björnsdóttir, Vaccination against atypical furunculosis and  
585 winter ulcer disease of fish, *Vaccine* 25(30) (2007) 5512-5523.
- 586 [15] M. Ingilæ, J.A. Arnesen, V. Lund, G. Eggset, Vaccination of Atlantic halibut  
587 *Hippoglossus hippoglossus* L., and spotted wolffish *Anarhichas minor* L., against atypical  
588 *Aeromonas salmonicida*, *Aquaculture* 183(1) (2000) 31-44.
- 589 [16] Y. Santos, S. García-Marquez, P. Pereira, F. Pazos, A. Riaza, R. Silva, A. El Morabit, F.  
590 Ubeira, Efficacy of furunculosis vaccines in turbot, *Scophthalmus maximus* (L.): evaluation of  
591 immersion, oral and injection delivery, *Journal of fish diseases* 28(3) (2005) 165-172.
- 592 [17] E. Biering, Ø. Vaagnes, B. Krossøy, S. Gulla, D. Colquhoun, Challenge models for  
593 atypical *Aeromonas salmonicida* and *Vibrio anguillarum* in farmed Ballan wrasse (*Labrus*  
594 *bergylta*) and preliminary testing of a trial vaccine against atypical *Aeromonas salmonicida*,  
595 *Journal of fish diseases* 39(10) (2016) 1257-1261.

- 596 [18] A. Rønneseth, G.T. Haugland, D.J. Colquhoun, E. Brudal, H.I. Wergeland, Protection and  
597 antibody reactivity following vaccination of lumpfish (*Cyclopterus lumpus* L.) against atypical  
598 *Aeromonas salmonicida*, *Fish Shellfish Immunol* 64 (2017) 383-391.
- 599 [19] B.K. Gudmundsdóttir, S. Gudmundsdóttir, Evaluation of cross protection by vaccines  
600 against atypical and typical furunculosis in Atlantic salmon, *Salmo salar* L, *Journal of Fish*  
601 *Diseases* 20(5) (1997) 343-350.
- 602 [20] A. Klindworth, E. Pruesse, T. Schweer, J. Peplies, C. Quast, M. Horn, F.O. Glöckner,  
603 Evaluation of general 16S ribosomal RNA gene PCR primers for classical and next-generation  
604 sequencing-based diversity studies, *Nucleic Acids Research* 41(1) (2013) e1-e1.
- 605 [21] S. Yamamoto, H. Kasai, D.L. Arnold, R.W. Jackson, A. Vivian, S. Harayama, Phylogeny  
606 of the genus *Pseudomonas*: intragenetic structure reconstructed from the nucleotide sequences  
607 of *gyrB* and *rpoD* genes The GenBank accession numbers for the sequences determined in this  
608 work are: *gyrB*, D37926, D37297, D86005–D86019 and AB039381–AB039492; *rpoD*,  
609 D86020–D86036 and AB039493–AB039624, *Microbiology* 146(10) (2000) 2385-2394.
- 610 [22] S. Gulla, V. Lund, A. Kristoffersen, H. Sørum, D. Colquhoun, *vapA* (A-layer) typing  
611 differentiates *Aeromonas salmonicida* subspecies and identifies a number of previously  
612 undescribed subtypes, *Journal of fish diseases* 39(3) (2016a) 329-342.
- 613 [23] N.D. Young, I. Dyková, B.F. Nowak, R.N. Morrison, Development of a diagnostic PCR  
614 to detect *Neoparamoeba perurans*, agent of amoebic gill disease, *Journal of Fish Diseases* 31(4)  
615 (2008) 285-295.
- 616 [24] OIE, Manual of diagnostic tests for aquatic animals, Chapter 2.3, (2018).
- 617 [25] K. Bartie, F.W. Austin, A. Diab, C. Dickson, T.T. Dung, M. Giacomini, M. Crumlish,  
618 Intraspecific diversity of *Edwardsiella ictaluri* isolates from diseased freshwater catfish,  
619 *Pangasianodon hypophthalmus* (Sauvage), cultured in the Mekong Delta, Vietnam, *Journal of*  
620 *fish diseases* 35(9) (2012) 671-682.
- 621 [26] M.-L. Hänninen, V. Hirvelä-Koski, Genetic diversity of atypical *Aeromonas salmonicida*  
622 studied by pulsed-field gel electrophoresis, *Epidemiology & Infection* 123(2) (1999) 299-307.
- 623 [27] L.J. Reed, H. Muench, A simple method of estimating fifty per cent endpoints, *American*  
624 *Journal of Epidemiology* 27(3) (1938) 493-497.



- 625 [28] A. Adams, K.D. Thompson, D. Morris, C. Farias, S.C. Chen, Development and use of  
626 monoclonal antibody probes for immunohistochemistry, ELISA and IFAT to detect bacterial  
627 and parasitic fish pathogens, *Fish & Shellfish Immunology* 5(8) (1995) 537-547.
- 628 [29] D.F. Amend, Potency testing of fish vaccines, *Fish biologics: serodiagnostics and vaccines*  
629 (1981) 447-454.
- 630 [30] T. Erkinharju, M.R. Lundberg, E. Isdal, I. Hordvik, R.A. Dalmo, T. Seternes, Studies on  
631 the antibody response and side effects after intramuscular and intraperitoneal injection of  
632 Atlantic lumpfish (*Cyclopterus lumpus* L.) with different oil-based vaccines, *Journal of Fish*  
633 *Diseases* 40(12) (2017) 1805-1813.
- 634 [31] A. Rønneseth, D.B. Ghebretnsae, H.I. Wergeland, G.T. Haugland, Functional  
635 characterization of IgM+ B cells and adaptive immunity in lumpfish (*Cyclopterus lumpus* L.),  
636 *Developmental & Comparative Immunology* 52(2) (2015) 132-143.
- 637 [32] A.B. Romstad, L.J. Reitan, P. Midtlyng, K. Gravningen, Ø. Evensen, Development of an  
638 antibody ELISA for potency testing of furunculosis (*Aeromonas salmonicida* subsp  
639 *salmonicida*) vaccines in Atlantic salmon (*Salmo salar* L), *Biologicals* 40(1) (2012) 67-71.
- 640 [33] A.B. Romstad, L.J. Reitan, P. Midtlyng, K. Gravningen, Ø. Evensen, Antibody responses  
641 correlate with antigen dose and in vivo protection for oil-adjuvanted, experimental furunculosis  
642 (*Aeromonas salmonicida* subsp. *salmonicida*) vaccines in Atlantic salmon (*Salmo salar* L.) and  
643 can be used for batch potency testing of vaccines, *Vaccine* 31(5) (2013) 791-796.
- 644 [34] K.R. Villumsen, I. Dalsgaard, L. Holten-Andersen, M.K. Raida, Potential role of specific  
645 antibodies as important vaccine induced protective mechanism against *Aeromonas salmonicida*  
646 in rainbow trout, *PLoS One* 7(10) (2012).
- 647 [35] R.N. Grøntvedt, S. Espelid, Vaccination and immune responses against atypical  
648 *Aeromonas salmonicida* in spotted wolffish (*Anarhichas minor* Olafsen) juveniles, *Fish &*  
649 *Shellfish Immunology* 16(3) (2004) 271-285.
- 650 [36] P. Vanden Bergh, M. Heller, S. Braga-Lagache, J. Frey, The *Aeromonas salmonicida*  
651 subsp. *salmonicida* exoproteome: global analysis, moonlighting proteins and putative antigens  
652 for vaccination against furunculosis, *Proteome Science* 11(1) (2013) 44.
- 653 [37] R.C. Cipriano, J. Bertolini, Selection for virulence in the fish pathogen *Aeromonas*  
654 *salmonicida*, using coomassie brilliant blue agar, *Journal of Wildlife Diseases* 24(4) (1988)  
655 672-678.

- 656 [38] R.A. Garduño, A.R. Moore, G. Olivier, A.L. Lizama, E. Garduño, W.W. Kay, Host cell  
657 invasion and intracellular residence by *Aeromonas salmonicida*: role of the S-layer, *Can J*  
658 *Microbiol* 46(7) (2000) 660-8.
- 659 [39] G. Olivier, Virulence of *Aeromonas salmonicida*: Lack of Relationship with Phenotypic  
660 Characteristics, *Journal of Aquatic Animal Health* 2(2) (1990) 119-127.
- 661 [40] E.E. Ishiguro, W.W. Kay, T. Ainsworth, J.B. Chamberlain, R.A. Austen, J.T. Buckley,  
662 T.J. Trust, Loss of virulence during culture of *Aeromonas salmonicida* at high temperature,  
663 *Journal of Bacteriology* 148(1) (1981) 333-340.
- 664 [41] A.E. Ellis, A.S. Burrows, K.J. Stapleton, Lack of relationship between virulence of  
665 *Aeromonas salmonicida* and the putative virulence factors: A-layer, extracellular proteases and  
666 extracellular haemolysins, *Journal of Fish Diseases* 11(4) (1988) 309-323.
- 667 [42] S. Gulla, S. Bayliss, B. Björnsdóttir, I. Dalsgaard, O. Haenen, E. Jansson, U. McCarthy,  
668 F. Scholz, M. Vercauteren, D. Verner-Jeffreys, Biogeography of the fish pathogen *Aeromonas*  
669 *salmonicida* inferred by *vapA* genotyping, *FEMS microbiology letters* 366(7) (2019) fnz074.
- 670 [43] D. Basti, D. Bouchard, A. Lichtenwalner, Safety of Florfenicol in the Adult Lobster  
671 (*Homarus americanus*), *Journal of Zoo and Wildlife Medicine* 42(1) (2011) 131-133, 3.
- 672 [44] D.A. Bouchard, Investigating Present-day Health Issues of the American Lobster  
673 (*Homarus americanus*), (2018).
- 674 [45] J. Treasurer, T. Birkbeck, *Pseudomonas anguilliseptica* associated with mortalities in  
675 lumpfish (*Cyclopterus lumpus* L.) reared in Scotland, *Bulletin of the European Association of*  
676 *Fish Pathologists* 38 (2018) 222-224.
- 677 [46] A. Adams, Progress, challenges and opportunities in fish vaccine development, *Fish &*  
678 *shellfish immunology* 90 (2019) 210-214.
- 679 [47] C.W.E. Embregts, M. Forlenza, Oral vaccination of fish: Lessons from humans and  
680 veterinary species, *Developmental & Comparative Immunology* 64 (2016) 118-137.
- 681 [48] S. Gudmundsdóttir, S. Lange, B. Magnadóttir, B.K. Gudmundsdóttir, Protection against  
682 atypical furunculosis in Atlantic halibut, *Hippoglossus hippoglossus* (L.); comparison of a  
683 commercial furunculosis vaccine and an autogenous vaccine, *Journal of Fish Diseases* 26(6)  
684 (2003) 331-338.

685 [49] R. Nordmo, A. Ramstad, Variables affecting the challenge pressure of *Aeromonas*  
686 *salmonicida* and *Vibrio salmonicida* in Atlantic salmon (*Salmo salar* L.), *Aquaculture* 171(1)  
687 (1999) 1-12.

688
